# Supplementary material for: CompIgS: A Computational Workflow for comparative analysis of related clonotypes within distinct antibody subclasses
Source: Research Square preprint supplement (doi:10.21203/rs.3.rs-7048307/v1), 2025-07-29
Supplement: Supplementary file 1 [file 5e6f90a9898d6f1a69e7a376.docx]

**Supplementary Methods**

**Computational Workflow**

**Python Libraries and Dependencies**

The analysis relied on the following Python libraries and functions:

**Pandas**: Primary library for data manipulation, statistical calculations, and handling missing values. Key functions included:

- .isin(), .astype(), .str.strip() for data processing
- .nunique(), .mean(), .sum() for statistical aggregation

**Built-in Python functions**:

- set() for generating unique CDR3 sequence collections and fast membership testing

**Algorithmic Workflow**

**Step 1: Generate IgG1 CDR3 AA Reference Set**

A reference set of unique CDR3 AA sequences from the IgG1 repertoire was generated using:

stats_IgG1_Aminotab_productive_CDR3IMGT = set(stats_IgG1_Aminotab_productive[column_cdr3])

**Step 2: Mutation Level Stratification**

Shared IgE clonotypes were stratified into three hypermutation categories (low, moderate, and high). For each mutation category, clones were filtered for downstream analysis of their VDJ identifiers, copy number, and CDR3 AA sequences. Stratification was performed as follows:

# Filter the low-mutated shared IgE

stats_tab_mutated_low_mut_Shared_IgE = stats_IgE_mut_3[

(stats_IgE_mut_3['Match_in_shared_IgE_seqid']) &

(stats_IgE_mut_3['V-REGION Nb of mutations-ex'] >= 0) &

(stats_IgE_mut_3['V-REGION Nb of mutations-ex'] <= 5)]

# Filter the moderate mutated shared IgE

stats_tab_mutated_mod_mut_Shared_IgE = stats_IgE_mut_3[

(stats_IgE_mut_3['Match_in_shared_IgE_seqid']) &

(stats_IgE_mut_3['V-REGION Nb of mutations-ex'] >= 6) &

(stats_IgE_mut_3['V-REGION Nb of mutations-ex'] <= 11)]

# Filter the highly mutated shared IgE

stats_tab_mutated_high_mut_Shared_IgE = stats_IgE_mut_3[

(stats_IgE_mut_3['Match_in_shared_IgE_seqid']) &

(stats_IgE_mut_3['V-REGION Nb of mutations-ex'] >= 12)]

**Step 3: CDR3 Similarity Assessment**

For each mutation level, IgE CDR3 sequences were compared against the IgG1 reference set using Boolean matching:

stats_tab_[level]_mutated_shared_IgE_VDJ_compare['Match_in_[level]_mutated_IgG1_CDR3IMGT'] = (

stats_tab_[level]_mutated_shared_IgE_VDJ_compare['cdr3aa'].isin(stats_IgG1_Aminotab_productive_CDR3IMGT))

**Step 4: Data Type Standardization**

Boolean results were converted to strings and cleaned for downstream analysis:

.astype(str).str.strip()

**Step 5: Divergent vs. Non-Divergent Classification**

Shared IgE clones were classified based on CDR3-AA presence in the IgG1 reference set:

- **Divergent clones**: CDR3 AA sequences absent in IgG1 (Match == 'False')
- **Non-divergent clones**: CDR3 AA sequences present in IgG1 (Match == 'True')

**Step 6: CDR3 Mutation Filtering**

Divergent clones with ≥2 non-silent mutations in the VH-CDR3 region were selected:

(stats_IgE_mut_3_mut_level_compare['CDR3-IMGT Nb of nonsilent mutations-ex'] >= 2)

**Step 7: Statistical Analysis**

Summary statistics of stratified clones were computed using:

- **Clone counts**: .nunique(dropna=True)
- **Mean copy numbers**: .mean() (with pd.isna() handling)
- **Total copy numbers**: .sum() (with pd.isna() handling)
